# Supplementary material for: Prognostic model of kidney renal clear cell carcinoma using aging-related long noncoding RNA signatures identifies THBS1-IT1 as a potential prognostic biomarker for multiple cancers
Source: publisher site journal article supplement (doi:10.18632/aging.204949), 2023-09-13
Supplement: Supplementary file [file aging-v15i17-204949-supplementary-material-SD5.pdf]

**Supplementary Table 4. Comparison of clinical variables between the training set and validation set.**

| <b>Covariates</b> | <b>Entire set</b> | <b>Training set</b> | <b>Validation set</b> | <b>P-value</b> |
|-------------------|-------------------|---------------------|-----------------------|----------------|
| <b>Age</b>        |                   |                     |                       | <b>0.7477</b>  |
| <=65              | 341(66.34%)       | 231(66.96%)         | 110(65.09%)           |                |
| >65               | 173(33.66%)       | 114(33.04%)         | 59(34.91%)            |                |
| <b>Gender</b>     |                   |                     |                       | <b>0.7954</b>  |
| FEMALE            | 180(35.02%)       | 119(34.49%)         | 61(36.09%)            |                |
| MALE              | 334(64.98%)       | 226(65.51%)         | 108(63.91%)           |                |
| <b>Grade</b>      |                   |                     |                       | <b>0.9163</b>  |
| G1                | 13(2.53%)         | 8(2.32%)            | 5(2.96%)              |                |
| G2                | 217(42.22%)       | 148(42.9%)          | 69(40.83%)            |                |
| G3                | 201(39.11%)       | 132(38.26%)         | 69(40.83%)            |                |
| G4                | 75(14.59%)        | 51(14.78%)          | 24(14.2%)             |                |
| unknow            | 8(1.56%)          | 6(1.74%)            | 2(1.18%)              |                |
| <b>Stage</b>      |                   |                     |                       | <b>0.3022</b>  |
| Stage I           | 252(49.03%)       | 174(50.43%)         | 78(46.15%)            |                |
| Stage II          | 55(10.7%)         | 38(11.01%)          | 17(10.06%)            |                |
| Stage III         | 122(23.74%)       | 73(21.16%)          | 49(28.99%)            |                |
| Stage IV          | 82(15.95%)        | 57(16.52%)          | 25(14.79%)            |                |
| unknow            | 3(0.58%)          | 3(0.87%)            | 0(0%)                 |                |
