# Supplementary material for: Prognostic model of kidney renal clear cell carcinoma using aging-related long noncoding RNA signatures identifies THBS1-IT1 as a potential prognostic biomarker for multiple cancers
Source: Aging (Albany NY). 2023 Sep 13;15(17):8630–63. doi: 10.18632/aging.204949 (PMC10522375; doi:10.18632/aging.204949)
Supplement: Supplementary Table 2 [file aging-15-204949-s003.xlsx]

## Sheet: Table S2
Supplementary Table 2. The activation states of biological pathways in distinct AR-subtype by GSVA enrichment analysis.
id	logFC	AveExpr	t	P.Value	adj.P.Val	B
KEGG_PRIMARY_IMMUNODEFICIENCY	0.439143	-0.0304935	14.1642	5.40969e-39	1.0062e-36	77.7874
KEGG_INTESTINAL_IMMUNE_NETWORK_FOR_IGA_PRODUCTION	0.398961	-0.0278589	12.9155	1.78865e-33	1.66344e-31	65.2267
KEGG_AUTOIMMUNE_THYROID_DISEASE	0.351098	-0.0121963	11.6178	5.02145e-28	2.51085e-26	52.8374
KEGG_ALLOGRAFT_REJECTION	0.443437	-0.0308831	11.6101	5.39968e-28	2.51085e-26	52.7657
KEGG_GRAFT_VERSUS_HOST_DISEASE	0.425608	-0.0260677	11.4248	3.03933e-27	1.13063e-25	51.0604
KEGG_ASTHMA	0.366688	-0.0286586	11.3634	5.3685e-27	1.66423e-25	50.499
KEGG_TYPE_I_DIABETES_MELLITUS	0.381874	-0.0261173	10.8467	5.99021e-25	1.59169e-23	45.848
KEGG_CYTOKINE_CYTOKINE_RECEPTOR_INTERACTION	0.214205	-0.0274281	10.3905	3.42897e-23	7.97235e-22	41.8577
KEGG_HEMATOPOIETIC_CELL_LINEAGE	0.245727	-0.0123808	9.59944	2.91017e-20	6.01435e-19	35.2155
KEGG_SYSTEMIC_LUPUS_ERYTHEMATOSUS	0.186455	-0.0209154	8.26503	1.07325e-15	1.99624e-14	24.8809
KEGG_PROPANOATE_METABOLISM	-0.295664	-0.0267826	-7.77521	3.79517e-14	5.95507e-13	21.3857
KEGG_ANTIGEN_PROCESSING_AND_PRESENTATION	0.231432	-0.0183819	7.77348	3.84198e-14	5.95507e-13	21.3737
KEGG_PROXIMAL_TUBULE_BICARBONATE_RECLAMATION	-0.208378	-0.0340593	-7.47211	3.16875e-13	4.53376e-12	19.3084
KEGG_BUTANOATE_METABOLISM	-0.240612	-0.0169378	-7.18564	2.21618e-12	2.94435e-11	17.407
KEGG_LEISHMANIA_INFECTION	0.240431	-0.0224241	7.1415	2.97468e-12	3.6886e-11	17.1194
KEGG_VALINE_LEUCINE_AND_ISOLEUCINE_DEGRADATION	-0.282205	-0.0202336	-7.02105	6.59316e-12	7.66455e-11	16.3423
KEGG_CITRATE_CYCLE_TCA_CYCLE	-0.293053	-0.0197411	-6.98569	8.31134e-12	9.09359e-11	16.1162
KEGG_NITROGEN_METABOLISM	-0.143981	-0.0209711	-6.87277	1.73048e-11	1.78816e-10	15.4007
KEGG_NATURAL_KILLER_CELL_MEDIATED_CYTOTOXICITY	0.178685	-0.0253628	6.78454	3.04865e-11	2.98447e-10	14.8485
KEGG_CYTOSOLIC_DNA_SENSING_PATHWAY	0.16325	-0.0227165	6.72574	4.43203e-11	4.12179e-10	14.4837
KEGG_VIRAL_MYOCARDITIS	0.197142	-0.0248448	6.66247	6.6097e-11	5.85431e-10	14.0943
KEGG_PYRUVATE_METABOLISM	-0.207333	-0.0366	-6.61937	8.66268e-11	7.3239e-10	13.8308
KEGG_FATTY_ACID_METABOLISM	-0.223708	-0.0199419	-6.15165	1.48725e-09	1.20273e-08	11.0658
KEGG_LIMONENE_AND_PINENE_DEGRADATION	-0.255662	-0.0175243	-5.88604	6.92351e-09	5.32071e-08	9.57409
KEGG_LYSINE_DEGRADATION	-0.204218	-0.0217726	-5.88034	7.15149e-09	5.32071e-08	9.5427
KEGG_CELL_ADHESION_MOLECULES_CAMS	0.155516	-0.0245922	5.75358	1.45985e-08	1.04435e-07	8.85173
KEGG_TERPENOID_BACKBONE_BIOSYNTHESIS	-0.205846	-0.0291528	-5.70431	1.91973e-08	1.32248e-07	8.58677
KEGG_BIOSYNTHESIS_OF_UNSATURATED_FATTY_ACIDS	-0.170943	-0.0345335	-5.60362	3.33914e-08	2.21814e-07	8.05158
KEGG_PPAR_SIGNALING_PATHWAY	-0.135367	-0.0210451	-5.54074	4.69835e-08	3.01342e-07	7.72166
KEGG_GLYCOSYLPHOSPHATIDYLINOSITOL_GPI_ANCHOR_BIOSYNTHESIS	-0.200163	-0.0183915	-5.48829	6.23147e-08	3.86351e-07	7.449
KEGG_GLYOXYLATE_AND_DICARBOXYLATE_METABOLISM	-0.191179	-0.0308001	-5.47465	6.70366e-08	4.02219e-07	7.3785
KEGG_GLYCINE_SERINE_AND_THREONINE_METABOLISM	-0.158793	-0.0298671	-5.4408	8.0313e-08	4.66819e-07	7.20413
KEGG_VALINE_LEUCINE_AND_ISOLEUCINE_BIOSYNTHESIS	-0.187872	-0.0329785	-5.29037	1.77231e-07	9.98936e-07	6.4411
KEGG_CIRCADIAN_RHYTHM_MAMMAL	-0.179801	-0.0287488	-5.23213	2.39584e-07	1.31067e-06	6.15083
KEGG_GLYCOLYSIS_GLUCONEOGENESIS	-0.152582	-0.0246547	-5.02718	6.76684e-07	3.59609e-06	5.15266
KEGG_SELENOAMINO_ACID_METABOLISM	-0.149893	-0.0278343	-5.01682	7.12508e-07	3.68129e-06	5.10314
KEGG_PEROXISOME	-0.171149	-0.0261298	-4.9795	8.5727e-07	4.30952e-06	4.92562
KEGG_BETA_ALANINE_METABOLISM	-0.173498	-0.0210375	-4.93099	1.0884e-06	5.32744e-06	4.69666
KEGG_VASOPRESSIN_REGULATED_WATER_REABSORPTION	-0.172431	-0.0170904	-4.91368	1.18456e-06	5.64946e-06	4.61549
KEGG_JAK_STAT_SIGNALING_PATHWAY	0.103692	-0.0243917	4.86373	1.51042e-06	7.02345e-06	4.38261
KEGG_ARGININE_AND_PROLINE_METABOLISM	-0.12706	-0.0247107	-4.73854	2.75146e-06	1.24822e-05	3.80862
KEGG_RENIN_ANGIOTENSIN_SYSTEM	-0.1448	-0.0222324	-4.72149	2.98247e-06	1.32081e-05	3.73154
KEGG_CHEMOKINE_SIGNALING_PATHWAY	0.130445	-0.0252472	4.71125	3.13024e-06	1.35401e-05	3.68532
KEGG_TYPE_II_DIABETES_MELLITUS	-0.1117	-0.0215704	-4.64459	4.27798e-06	1.80842e-05	3.38693
KEGG_CYSTEINE_AND_METHIONINE_METABOLISM	-0.116104	-0.0329993	-4.56821	6.09087e-06	2.51756e-05	3.04983
KEGG_STEROID_BIOSYNTHESIS	-0.1479	-0.0404446	-4.56022	6.31827e-06	2.55478e-05	3.01488
KEGG_GLYCEROLIPID_METABOLISM	-0.102539	-0.034502	-4.51395	7.80499e-06	3.08878e-05	2.81349
KEGG_INSULIN_SIGNALING_PATHWAY	-0.128828	-0.0214525	-4.49205	8.6205e-06	3.34044e-05	2.71884
KEGG_HUNTINGTONS_DISEASE	-0.125397	-0.0343217	-4.4148	1.21992e-05	4.63073e-05	2.38842
KEGG_T_CELL_RECEPTOR_SIGNALING_PATHWAY	0.133727	-0.0269082	4.35784	1.57073e-05	5.69039e-05	2.14821
KEGG_ONE_CARBON_POOL_BY_FOLATE	-0.145301	-0.0347582	-4.35496	1.59086e-05	5.69039e-05	2.13611
KEGG_TIGHT_JUNCTION	-0.116117	-0.0269902	-4.32424	1.82095e-05	6.31623e-05	2.00785
KEGG_HISTIDINE_METABOLISM	-0.125335	-0.0312185	-4.32264	1.83374e-05	6.31623e-05	2.0012
KEGG_THYROID_CANCER	-0.14011	-0.0279116	-4.21531	2.92073e-05	9.87737e-05	1.55984
KEGG_ADIPOCYTOKINE_SIGNALING_PATHWAY	-0.119333	-0.0281115	-4.17491	3.47107e-05	0.000115289	1.3964
KEGG_ADHERENS_JUNCTION	-0.142223	-0.0198997	-4.11484	4.47507e-05	0.000146029	1.15614
KEGG_ALANINE_ASPARTATE_AND_GLUTAMATE_METABOLISM	-0.114999	-0.0344378	-4.06544	5.50206e-05	0.000176445	0.960997
KEGG_PARKINSONS_DISEASE	-0.127003	-0.036013	-3.97834	7.87942e-05	0.000248402	0.622325
KEGG_OXIDATIVE_PHOSPHORYLATION	-0.126831	-0.0369276	-3.75061	0.000195324	0.000595578	-0.230382
KEGG_PENTOSE_AND_GLUCURONATE_INTERCONVERSIONS	-0.105154	0.00299632	-3.73182	0.000210097	0.000610593	-0.298631
KEGG_ASCORBATE_AND_ALDARATE_METABOLISM	-0.114934	0.0117276	-3.7271	0.00021397	0.000611005	-0.315728
KEGG_TOLL_LIKE_RECEPTOR_SIGNALING_PATHWAY	0.10422	-0.018973	3.72369	0.000216808	0.000611005	-0.328056
KEGG_AMINOACYL_TRNA_BIOSYNTHESIS	-0.143679	-0.0128384	-3.68298	0.000253555	0.0007039	-0.47446
KEGG_ENDOMETRIAL_CANCER	-0.129118	-0.0165114	-3.66665	0.00026988	0.0007382	-0.532752
KEGG_BASAL_TRANSCRIPTION_FACTORS	-0.123699	-0.0217356	-3.56861	0.000390601	0.00105292	-0.877554
KEGG_NOD_LIKE_RECEPTOR_SIGNALING_PATHWAY	0.104884	-0.0273848	3.52789	0.00045431	0.00120717	-1.01815
KEGG_TRYPTOPHAN_METABOLISM	-0.108546	-0.0225281	-3.4497	0.000604753	0.00153539	-1.28379
KEGG_INOSITOL_PHOSPHATE_METABOLISM	-0.116445	-0.0167379	-3.44693	0.000610853	0.00153539	-1.2931
KEGG_PROSTATE_CANCER	-0.107256	-0.0144469	-3.2444	0.00124926	0.00305739	-1.95407
KEGG_RNA_DEGRADATION	-0.114955	-0.0169472	-3.19038	0.00150279	0.00353822	-2.1239
KEGG_ERBB_SIGNALING_PATHWAY	-0.10016	-0.0123937	-3.16391	0.00164361	0.00377422	-2.20609
KEGG_UBIQUITIN_MEDIATED_PROTEOLYSIS	-0.109701	-0.0181396	-3.11468	0.00193847	0.00439702	-2.35723
KEGG_PROTEIN_EXPORT	-0.124554	-0.0158646	-3.04094	0.00247204	0.0054738	-2.57932
KEGG_NON_HOMOLOGOUS_END_JOINING	-0.109415	-0.0201778	-2.77002	0.00579679	0.0112313	-3.35102
