# Supplementary material for: Prognostic model of kidney renal clear cell carcinoma using aging-related long noncoding RNA signatures identifies THBS1-IT1 as a potential prognostic biomarker for multiple cancers
Source: Aging (Albany NY). 2023 Sep 13;15(17):8630–63. doi: 10.18632/aging.204949 (PMC10522375; doi:10.18632/aging.204949)
Supplement: Supplementary Table 3 [file aging-15-204949-s004.xlsx]

## Sheet: Table S3
Supplementary Table 3. LncRNA-miRNA-mRNA network.
lncRNA	miRNA	mRNA
THBS1-IT1-201	hsa-miR-199b-5p	RNF11
		TAF9B
		DDX3X
		PODXL
		NLK
		GRB10
	hsa-miR-3200-3p	PURA
LEF1-AS1-201	hsa-miR-138-5p	FERMT2
		ARHGAP42
		S100A1
		RHOC
		TP53INP2
		RMND5A
		DMKN
		AGO1
		EID1
		ROCK2
		SIRT1
		EZH2
		PTK2
		ZMYND11
	hsa-miR-23b-3p	TNPO1
		PTK2B
		NLGN4X
		POM121C
		CNN2
		CHUK
		MMGT1
		CELF1
		FNIP1
		SEMA6D
		UQCRFS1
		PTEN
		MCFD2
		FBN2
		RRAS2
		SDHD
		MARCKS
		GHITM
		TNFAIP3
		ATXN7L3B
		CA2
		PRR14L
		ANKRD17
		RBPMS2
		STAT5B
		QSER1
		PNRC2
		SOCS6
		TMED7
		NUFIP2
		BTLA
		PPP1CB
		MET
		TAB3
		RPRD2
	hsa-miR-365a-3p	SGK1
		MYLIP
		ZNF644
		TMOD3
		USP22
		GXYLT1
		PCMTD2
		XPO4
		ZNF148
		KLRD1
		MCOLN2
		PAX6
		ACVR1
		SLC43A3
		NUFIP2
		COMMD5
		VGLL4
		MYLIP
		ZNF644
		TMOD3
		GXYLT1
		XPO4
		SGK1
		NUFIP2
		VGLL4
		ZNF148
		MCOLN2
		PRELP
		IQSEC3
		IGF1R
		AMER1
		LYN
		TAOK1
		PHLDA3
WDR11-DT-201	hsa-miR-27a-3p	TAOK1
		AFF4
		CD2AP
		ALG9
		C6orf120
		TGFBR3
		PAIP2
		FOXO1
		RYBP
		APPBP2
		SEMA7A
		SPRY2
		ZNF148
		PLAGL2
		MYT1
		MBTD1
		CELF2
		TNPO1
		PEG10
		LONRF1
		AKIRIN1
		TMEM167A
		KMT2C
		GPAM
		USP46
		CNN3
		TMED5
		SGMS1
		DCUN1D4
		E2F7
		LDLR
		LIFR
		ABHD17C
		GSE1
		HOXC6
		NPEPPS
		PDS5B
		SUCO
		PDHX
		MED13
		THRB
		DNAJC27
		PPARG
		RMND5A
		ADD1
		UBR5
		DYNLL2
		ELL2
		MKNK2
		PDIA5
		NR1D2
		NLN
		ZNF800
		TMBIM6
		GNG12
		EIF5
		LYSMD3
		ZFHX3
		MIER3
		GATA2
		EN2
		ANKRD40
		CCNK
		RNF139
		RREB1
		PHB
		NFE2L2
		TRIM23
		ITSN2
		SEMA6A
		PHLPP2
		NF1
		CAB39
